# Supplementary material for: Implications for the mechanism of sulfite oxidizing enzymes from pulsed EPR spectroscopy and DFT calculations for “difficult” nuclei
Source: Royal Society of Chemistry journal article supplement (doi:10.1039/c004404k), 2010-08-21
Supplement: c004404k.pdf [file c004404k.pdf]

## Implications for the Mechanism of Sulfite Oxidizing Enzymes from Pulsed EPR

### Spectroscopy and DFT Calculations for “Difficult” Nuclei

John H. Enemark, Arnold M. Raitsimring, Andrei V. Astashkin, Eric L. Klein

Department of Chemistry and Biochemistry

University of Arizona, Tucson, Arizona 85721-0041, USA

Email: [jenemark@u.arizona.edu](mailto:jenemark@u.arizona.edu)

### Supplementary Data

Optimized XYZ atom coordinates of the sulfate-bound Mo(V) computational model:

|    |           |           |           |
|----|-----------|-----------|-----------|
| C  | 2.258992  | -3.485989 | 1.207005  |
| C  | 0.793709  | -3.884065 | 1.384943  |
| S  | -0.368040 | -2.504367 | 1.851116  |
| S  | -3.054947 | 0.077112  | 2.542035  |
| O  | -2.240590 | -0.193256 | 3.779660  |
| O  | -4.047345 | -0.995895 | 2.184897  |
| O  | -3.593511 | 1.480602  | 2.444255  |
| C  | -0.684819 | 0.549445  | -4.364000 |
| C  | 0.356239  | 0.079850  | -5.380252 |
| C  | -0.459525 | -0.120743 | -3.026998 |
| S  | -1.294122 | 0.552940  | -1.615208 |
| C  | 0.303466  | -1.233953 | -2.943837 |
| S  | 0.576351  | -2.081178 | -1.402327 |
| C  | 0.959718  | -1.850314 | -4.154041 |
| O  | 0.465079  | -1.346605 | -5.414157 |
| Mo | -0.303897 | -0.580378 | 0.362920  |
| O  | -1.909521 | 0.054966  | 1.241059  |
| O  | 0.999043  | 0.420416  | 0.876039  |
| H  | 2.370168  | -2.755387 | 0.395664  |
| H  | 2.880425  | -4.369075 | 0.961801  |
| H  | 2.653848  | -3.031862 | 2.129670  |
| H  | 0.686577  | -4.618508 | 2.200008  |
| H  | 0.421683  | -4.352411 | 0.459878  |
| H  | -0.616687 | 1.646777  | -4.253702 |
| H  | -1.703805 | 0.334389  | -4.738186 |
| H  | 0.086371  | 0.383605  | -6.405710 |
| H  | 1.344105  | 0.525271  | -5.134038 |
| H  | 0.779189  | -2.937615 | -4.178989 |
| H  | 2.062758  | -1.700209 | -4.115261 |

Optimized XYZ atom coordinates of the sulfite-bound Mo(V) computational model:

|    |           |           |           |
|----|-----------|-----------|-----------|
| C  | 2.236654  | -3.317426 | 1.253743  |
| C  | 0.789887  | -3.786536 | 1.406904  |
| S  | -0.437037 | -2.454628 | 1.839344  |
| S  | -3.120279 | -0.423676 | 2.742918  |
| O  | -4.504943 | -0.676336 | 2.156376  |
| O  | -3.039920 | 0.898041  | 3.501829  |
| C  | -0.566212 | 0.579400  | -4.474622 |
| C  | 0.459451  | 0.026733  | -5.463799 |
| C  | -0.421581 | -0.090734 | -3.125861 |
| S  | -1.241840 | 0.661068  | -1.744810 |
| C  | 0.254073  | -1.258338 | -3.017955 |
| S  | 0.447924  | -2.111147 | -1.466425 |
| C  | 0.885452  | -1.932720 | -4.210073 |
| O  | 0.462481  | -1.403576 | -5.487929 |
| Mo | -0.395382 | -0.535307 | 0.290539  |
| O  | -2.019019 | 0.004139  | 1.042527  |
| O  | 0.877301  | 0.492768  | 0.853818  |
| H  | 2.318503  | -2.583330 | 0.441276  |
| H  | 2.905622  | -4.168390 | 1.018740  |
| H  | 2.593299  | -2.841731 | 2.181257  |
| H  | 0.704171  | -4.527108 | 2.219607  |
| H  | 0.457743  | -4.270235 | 0.474745  |
| H  | -0.420542 | 1.670280  | -4.371170 |
| H  | -1.589717 | 0.436940  | -4.872045 |
| H  | 0.237059  | 0.343104  | -6.497466 |
| H  | 1.472095  | 0.399368  | -5.196590 |
| H  | 0.619964  | -3.002804 | -4.232181 |
| H  | 1.996294  | -1.870998 | -4.148114 |
